# Supplementary material
Source: PubMed Central journal article supplement (PMC3123037)
Supplement: supp_C111.250407_jbc.C111.250407-1.pdf [file supp_C111.250407_jbc.C111.250407-1.pdf]

## Supplementary Figures

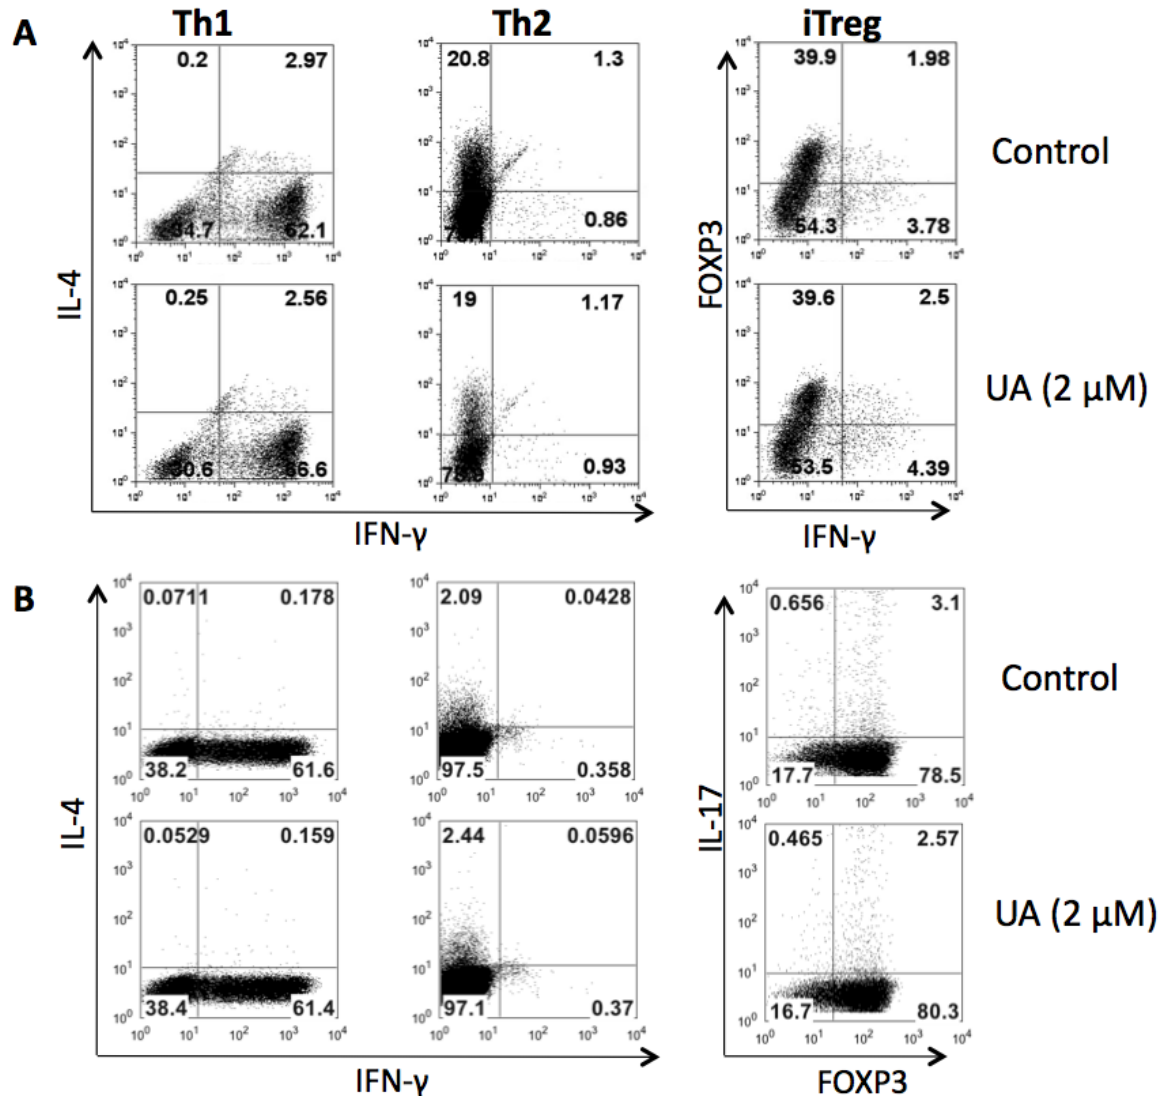

**FIGURE S1. The effect of UA on other T lineage differentiation.** *A*, the effect of UA on human Th1, Th2, and iTreg cell differentiation. *B*, the effect of UA on mouse Th1, Th2, and iTreg cell differentiation.

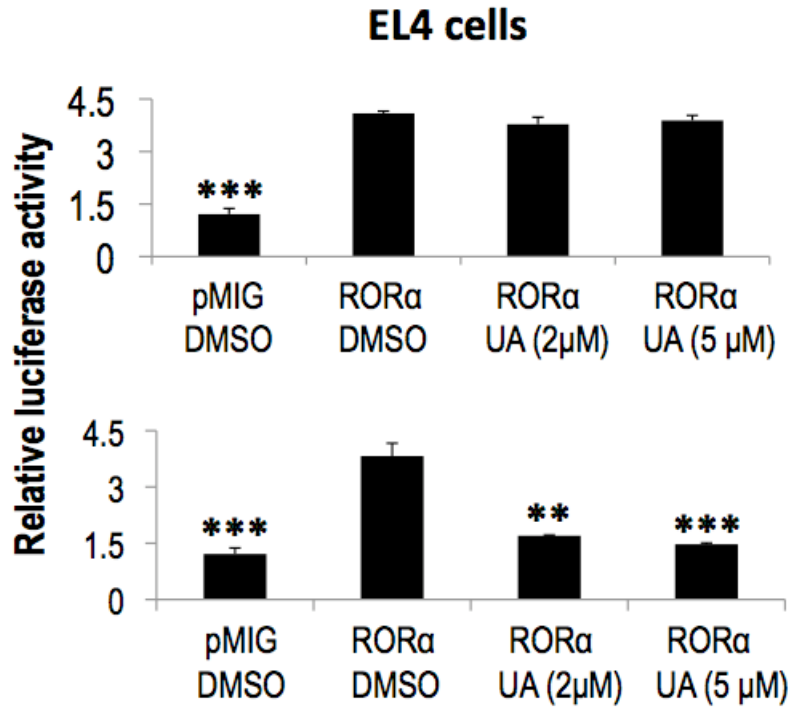

**FIGURE. S2: UA selectively blocks ROR $\gamma$ t – dependent reporter activity.** EL4 cells were transfected with CNS2-II17 reporter together with ROR $\alpha$ , ROR $\gamma$ t or control plasmids. UA or DMSO was added after transfection and the cells were harvested next day for dual-luciferase activity assays after PMA/Inomycin restimulation. The data were normalized to an internal control renilla luciferase. The reporter gene assay was repeated 2 times with consistent results.
